# Supplementary material for: FeS2 nanosheets encapsulated in 3D porous carbon spheres for excellent Na storage in sodium-ion batteries
Source: Royal Society of Chemistry journal article supplement (doi:10.1039/c8qi00679b), 2018-01-01
Supplement: c8qi00679b1.pdf [file c8qi00679b1.pdf]

## FeS<sub>2</sub> nanosheets encapsulated in 3D porous carbon spheres for excellent Na storage in sodium-ion batteries

Fengbo Wang, Guangda Li\*, Xiangeng Meng, Yongxing Li, Qifa Gao, Yaqia Xu and Wenfeng Cui

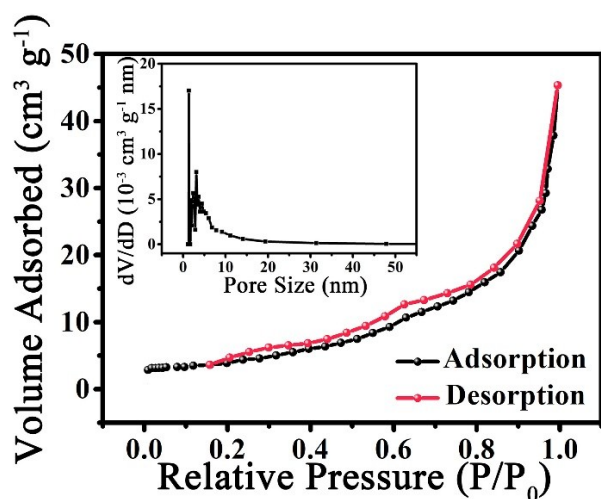

Fig. S1 N<sub>2</sub> adsorption/desorption isotherms and the corresponding pore size distribution of (inset) of FeS<sub>2</sub>@C-2h.

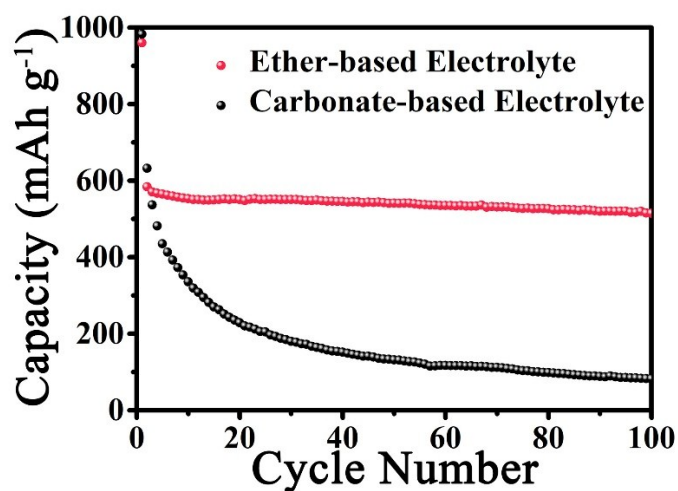

Fig. S2 Cycling performance of FeS<sub>2</sub>@C-2h tested in ether- and carbonate-based electrolytes at 500 mA g<sup>-1</sup>.
